# Supplementary material
Source: PubMed Central journal article supplement (PMC6545085)
Supplement: rspb20190603_review_history.pdf [file rspb20190603_review_history.pdf]

## Bee pathogen transmission dynamics: deposition, persistence and acquisition on flowers

Laura L. Figueroa, Malcolm Blinder, Cali Grincavitch, Angus Jelinek, Emilia K. Mann, Liam A. Merva, Lucy E. Metz, Amy Y. Zhao, Rebecca E. Irwin, Scott H. McArt and Lynn S. Adler

### Article citation details

*Proc. R. Soc. B* **286**: 20190603.  
<http://dx.doi.org/10.1098/rspb.2019.0603>

### Review timeline

Original submission: 13 March 2019  
Revised submission: 19 April 2019  
Final acceptance: 3 May 2019

Note: Reports are unedited and appear as submitted by the referee. The review history appears in chronological order.

## Review History

### RSPB-2019-0603.R0 (Original submission)

#### Review form: Reviewer 1 (Matías Maggi)

##### Recommendation

Accept with minor revision (please list in comments)

##### Scientific importance: Is the manuscript an original and important contribution to its field?

Good

##### General interest: Is the paper of sufficient general interest?

Good

##### Quality of the paper: Is the overall quality of the paper suitable?

Excellent

##### Is the length of the paper justified?

Yes

**Should the paper be seen by a specialist statistical reviewer?**

No

**Do you have any concerns about statistical analyses in this paper? If so, please specify them explicitly in your report.**

No

**It is a condition of publication that authors make their supporting data, code and materials available - either as supplementary material or hosted in an external repository. Please rate, if applicable, the supporting data on the following criteria.**

**Is it accessible?**

N/A

**Is it clear?**

N/A

**Is it adequate?**

N/A

**Do you have any ethical concerns with this paper?**

No

#### **Comments to the Author**

The manuscript provide interesting information related to adquisition of trypanosomatids parasites on bumblebees. I find the work well performed, with a clear introduction and objectives. I have some doubts that I marked on the third experiment. I have made some minor comments in the file attached (See Appendix A).

## **Review form: Reviewer 2 (Margarita Lopez-Uribe)**

#### **Recommendation**

Accept with minor revision (please list in comments)

**Scientific importance: Is the manuscript an original and important contribution to its field?**

Excellent

**General interest: Is the paper of sufficient general interest?**

Good

**Quality of the paper: Is the overall quality of the paper suitable?**

Excellent

**Is the length of the paper justified?**

Yes

**Should the paper be seen by a specialist statistical reviewer?**

No

**Do you have any concerns about statistical analyses in this paper? If so, please specify them explicitly in your report.**

No

**It is a condition of publication that authors make their supporting data, code and materials available - either as supplementary material or hosted in an external repository. Please rate, if applicable, the supporting data on the following criteria.**

**Is it accessible?**

No

**Is it clear?**

Yes

**Is it adequate?**

No

**Do you have any ethical concerns with this paper?**

No

### **Comments to the Author**

This study presents results from a series of experiments to understand the mechanisms of pathogen transmission between pollinators via flowers. The main goals of the study are to: (1) determine if infected bees tend to defecate more on flowers, (2) frequency of deposition changes with flower shape, and (3) pathogen survival and transmission varies with flower morphology. It was a pleasure to read this manuscript. It is clear and well-written. The experiments were well-done and the statistical analyses are clearly presented and seem appropriate.

I only have minor comments on the current version of this manuscript.

\* The title emphasizes that this study reveals new mechanisms of pathogen transmission. However, these mechanisms are not clearly stated or discussed in the abstract and the discussion. Even though the results of this study do not directly allow to test how generalizable these patterns are (meaning do deeper and longer corollas generally facilitate pathogen transmission?), it would benefit the paper to mention hypotheses that emerge from this study about general patterns linking flower morphology and pathogen transmission.

\* The results of the pathogen persistence under different environmental conditions are important, clean but are not highlighted in the paper. These results are not mentioned in the abstract and only briefly discussed.

\* L74 - This sentence is unclear. The question of whether bee infection increases deposition in flowers is easy to understand after the previous sentence. But why deposition may vary with floral morphology is not discussed until the next paragraph.

\*L99 - Perhaps the authors could provide more specific predictions about how they expected pathogen survival and infectiousness to vary in flowers with different morphologies and under different environmental conditions. These predictions would help the reader understand earlier on what the different experiments are testing.

\* L102-109 - This paragraph would be clearer if predictions were followed after the questions outlined here. In addition, it would probably be better to briefly describe the 3 experiments before the methods section. For example, what environmental conditions did you investigate?

Also, the phrasing of objective 4 is unclear. I suggest you change it for: "pathogen acquisition and subsequent infection of bees vary among different parts of the flower in different plant species".

\* Will the R scripts be shared as supplementary information? If so, can you indicate that in the text?

\* L325 - While the authors clarify this later in the text, I think the sentence "bigger bees defecated fewer times inside flowers" is misleading. As mentioned later on, it is likely that the bees were defecating at equal rates but they were doing that outside the flowers because they were larger. Could the authors rephrase? Maybe: "Fewer droplets were detected inside flowers visited by larger bees".

\*L385 - The authors mention in L306 that "foraging time" was collected for experiment 3. Could the authors investigate the role of time spent in the flower on how many pathogens were left behind after a visit? Or does foraging time mean something else?

\*L411- Add "across floral parts"

\* L423 - Sentence is unclear.

\* Figure 4 - I suggest you add the results for *Monarda* even if they were not significant. Or at least, mentioned in the legend in what way the data were not significant. Did all the *Crithidia* die or did they all survive in both treatments?

## Decision letter (RSPB-2019-0603.R0)

15-Apr-2019

Dear Ms Figueroa:

Your manuscript has now been peer reviewed and the reviews have been assessed by an Associate Editor. The reviewers' comments (not including confidential comments to the Editor) and the comments from the Associate Editor are included at the end of this email for your reference. As you will see, the reviewers and the Editors have raised some concerns with your manuscript and we would like to invite you to revise your manuscript to address them.

We do not allow multiple rounds of revision so we urge you to make every effort to fully address all of the comments at this stage. If deemed necessary by the Associate Editor, your manuscript will be sent back to one or more of the original reviewers for assessment. If the original reviewers are not available we may invite new reviewers. Please note that we cannot guarantee eventual acceptance of your manuscript at this stage.

To submit your revision please log into <http://mc.manuscriptcentral.com/prsb> and enter your Author Centre, where you will find your manuscript title listed under "Manuscripts with Decisions." Under "Actions", click on "Create a Revision". Your manuscript number has been appended to denote a revision.

When submitting your revision please upload a file under "Response to Referees" - in the "File Upload" section. This should document, point by point, how you have responded to the

reviewers' and Editors' comments, and the adjustments you have made to the manuscript. We require a copy of the manuscript with revisions made since the previous version marked as 'tracked changes' to be included in the 'response to referees' document.

Your main manuscript should be submitted as a text file (doc, txt, rtf or tex), not a PDF. Your figures should be submitted as separate files and not included within the main manuscript file.

When revising your manuscript you should also ensure that it adheres to our editorial policies (<https://royalsociety.org/journals/ethics-policies/>). You should pay particular attention to the following:

#### Research ethics:

If your study contains research on humans please ensure that you detail in the methods section whether you obtained ethical approval from your local research ethics committee and gained informed consent to participate from each of the participants.

#### Use of animals and field studies:

If your study uses animals please include details in the methods section of any approval and licences given to carry out the study and include full details of how animal welfare standards were ensured. Field studies should be conducted in accordance with local legislation; please include details of the appropriate permission and licences that you obtained to carry out the field work.

#### Data accessibility and data citation:

It is a condition of publication that you make available the data and research materials supporting the results in the article. Datasets should be deposited in an appropriate publicly available repository and details of the associated accession number, link or DOI to the datasets must be included in the Data Accessibility section of the article (<https://royalsociety.org/journals/ethics-policies/data-sharing-mining/>). Reference(s) to datasets should also be included in the reference list of the article with DOIs (where available).

In order to ensure effective and robust dissemination and appropriate credit to authors the dataset(s) used should also be fully cited and listed in the references.

If you wish to submit your data to Dryad (<http://datadryad.org/>) and have not already done so you can submit your data via this link [http://datadryad.org/submit?journalID=RSPB&manu=\(Document not available\)](http://datadryad.org/submit?journalID=RSPB&manu=(Document%20not%20available)), which will take you to your unique entry in the Dryad repository.

If you have already submitted your data to dryad you can make any necessary revisions to your dataset by following the above link.

For more information please see our open data policy <http://royalsocietypublishing.org/data-sharing>.

#### Electronic supplementary material:

All supplementary materials accompanying an accepted article will be treated as in their final form. They will be published alongside the paper on the journal website and posted on the online figshare repository. Files on figshare will be made available approximately one week before the accompanying article so that the supplementary material can be attributed a unique DOI. Please try to submit all supplementary material as a single file.

Online supplementary material will also carry the title and description provided during

submission, so please ensure these are accurate and informative. Note that the Royal Society will not edit or typeset supplementary material and it will be hosted as provided. Please ensure that the supplementary material includes the paper details (authors, title, journal name, article DOI). Your article DOI will be 10.1098/rspb.[paper ID in form xxxx.xxxx e.g. 10.1098/rspb.2016.0049].

Please submit a copy of your revised paper within three weeks. If we do not hear from you within this time your manuscript will be rejected. If you are unable to meet this deadline please let us know as soon as possible, as we may be able to grant a short extension.

Thank you for submitting your manuscript to Proceedings B; we look forward to receiving your revision. If you have any questions at all, please do not hesitate to get in touch.

Best wishes,  
Proceedings B  
mailto: proceedingsb@royalsociety.org

Associate Editor

Comments to Author:

The two reviewers were generally positive about this manuscript. They thought the manuscript is well written, the analyses correct and the results interesting and potentially appealing for the broad readership of Proceedings B. At the same time, both reviewers had several suggestions for improvement of the manuscript, particularly Reviewer 2, especially regarding the manuscript's title, the unclear relevance of some of the results, and the need for clarification or revision of parts of the methods, results and discussion sections and one figure (Fig. 4). Minor revisions should allow the authors to incorporate these suggestions.

Reviewer(s)' Comments to Author:

Referee: 1

Comments to the Author(s)

The manuscript provide interesting information related to adquisition of trypanosomatids parasites on bumblebees. I find the work well performed, with a clear introduction and objectives. I have some doubts that I marked on the third experiment. I have made some minor comments in the file attached.

Referee: 2

Comments to the Author(s)

This study presents results from a series of experiments to understand the mechanisms of pathogen transmission between pollinators via flowers. The main goals of the study are to: (1) determine if infected bees tend to defecate more on flowers, (2) frequency of deposition changes with flower shape, and (3) pathogen survival and transmission varies with flower morphology. it was a pleasure to read this manuscript. It is clear and well-written. The experiments were well-done and the statistical analyses are clearly presented and seem appropriate.

I only have minor comments on the current version of this manuscript.

\* The title emphasizes that this study reveals new mechanisms of pathogen transmission. However, these mechanisms are not clearly stated or discussed in the abstract and the discussion. Even though the results of this study do not directly allow to test how generalizable these

patterns are (meaning do deeper and longer corollas generally facilitate pathogen transmission?), it would benefit the paper to mention hypotheses that emerge from this study about general patterns linking flower morphology and pathogen transmission.

\* The results of the pathogen persistence under different environmental conditions are important, clean but are not highlighted in the paper. These results are not mentioned in the abstract and only briefly discussed.

\* L74 - This sentence is unclear. The question of whether bee infection increases deposition in flowers is easy to understand after the previous sentence. But why deposition may vary with floral morphology is not discussed until the next paragraph.

\*L99 - Perhaps the authors could provide more specific predictions about how they expected pathogen survival and infectiousness to vary in flowers with different morphologies and under different environmental conditions. These predictions would help the reader understand earlier on what the different experiments are testing.

\* L102-109 - This paragraph would be clearer if predictions were followed after the questions outlined here. In addition, it would probably be better to briefly describe the 3 experiments before the methods section. For example, what environmental conditions did you investigate? Also, the phrasing of objective 4 is unclear. I suggest you change it for: "pathogen acquisition and subsequent infection of bees vary among different parts of the flower in different plant species".

\* Will the R scripts be shared as supplementary information? If so, can you indicate that in the text?

\* L325 - While the authors clarify this later in the text, I think the sentence "bigger bees defecated fewer times inside flowers" is misleading. As mentioned later on, it is likely that the bees were defecating at equal rates but they were doing that outside the flowers because they were larger. Could the authors rephrase? Maybe: "Fewer droplets were detected inside flowers visited by larger bees".

\*L385 - The authors mention in L306 that "foraging time" was collected for experiment 3. Could the authors investigate the role of time spent in the flower on how many pathogens were left behind after a visit? Or does foraging time mean something else?

\*L411- Add "across floral parts"

\* L423 - Sentence is unclear.

\* Figure 4 - I suggest you add the results for *Monarda* even if they were not significant. Or at least, mentioned in the legend in what way the data were not significant. Did all the *Crithidia* die or did they all survive in both treatments?

## Author's Response to Decision Letter for (RSPB-2019-0603.R0)

See Appendix B.

## Decision letter (RSPB-2019-0603.R1)

03-May-2019

Dear Ms Figueroa

I am pleased to inform you that your manuscript entitled "Bee pathogen transmission dynamics: deposition, persistence and acquisition on flowers" has been accepted for publication in Proceedings B.

You can expect to receive a proof of your article from our Production office in due course, please check your spam filter if you do not receive it. PLEASE NOTE: you will be given the exact page length of your paper which may be different from the estimation from Editorial and you may be asked to reduce your paper if it goes over the 10 page limit.

If you are likely to be away from e-mail contact please let us know. Due to rapid publication and an extremely tight schedule, if comments are not received, we may publish the paper as it stands.

If you have any queries regarding the production of your final article or the publication date please contact [procb\\_proofs@royalsociety.org](mailto:procb_proofs@royalsociety.org)

### Open Access

You are invited to opt for Open Access, making your freely available to all as soon as it is ready for publication under a CCBY licence. Our article processing charge for Open Access is £1700.

Corresponding authors from member institutions

(<http://royalsocietypublishing.org/site/librarians/allmembers.xhtml>) receive a 25% discount to these charges. For more information please visit <http://royalsocietypublishing.org/open-access>.

Your article has been estimated as being 10 pages long. Our Production Office will be able to confirm the exact length at proof stage.

### Paper charges

An e-mail request for payment of any related charges will be sent out after proof stage (within approximately 2-6 weeks). The preferred payment method is by credit card; however, other payment options are available

### Electronic supplementary material:

All supplementary materials accompanying an accepted article will be treated as in their final form. They will be published alongside the paper on the journal website and posted on the online figshare repository. Files on figshare will be made available approximately one week before the accompanying article so that the supplementary material can be attributed a unique DOI.

Thank you for your fine contribution. On behalf of the Editors of the Proceedings B, we look forward to your continued contributions to the Journal.

Sincerely,

Proceedings B

<mailto:proceedingsb@royalsociety.org>



Associate Editor:

Board Member

Comments to Author:

The authors have incorporated the comments made by the two reviewers. I think this is a great study of transmission dynamics of bee pathogens. I congratulate the authors for their excellent work.

**Appendix A****PROCEEDINGS OF  
THE ROYAL SOCIETY B**

BIOLOGICAL SCIENCES

**Mechanisms mediating bee pathogen transmission:  
deposition, persistence and acquisition on flowers**

|                               |                                                                                                                                                                                                                                                                                                                                                                                                                                                                                                                                                                                                                                                                                              |
|-------------------------------|----------------------------------------------------------------------------------------------------------------------------------------------------------------------------------------------------------------------------------------------------------------------------------------------------------------------------------------------------------------------------------------------------------------------------------------------------------------------------------------------------------------------------------------------------------------------------------------------------------------------------------------------------------------------------------------------|
| Journal:                      | <i>Proceedings B</i>                                                                                                                                                                                                                                                                                                                                                                                                                                                                                                                                                                                                                                                                         |
| Manuscript ID                 | RSPB-2019-0603                                                                                                                                                                                                                                                                                                                                                                                                                                                                                                                                                                                                                                                                               |
| Article Type:                 | Research                                                                                                                                                                                                                                                                                                                                                                                                                                                                                                                                                                                                                                                                                     |
| Date Submitted by the Author: | 13-Mar-2019                                                                                                                                                                                                                                                                                                                                                                                                                                                                                                                                                                                                                                                                                  |
| Complete List of Authors:     | Figueroa, Laura; Cornell University, Entomology<br>Blinder, Malcolm; University of Massachusetts Amherst, Biology<br>Grincavitch, Cali; University of Massachusetts Amherst<br>Jelinek, Angus; University of Massachusetts Amherst, Biology<br>Mann, Emilia; University of Massachusetts Amherst, Biology<br>Merva, Liam; University of Massachusetts Amherst, Biology<br>Metz, Lucy; University of Massachusetts Amherst, Biology<br>Zhao, Amy; University of Massachusetts Amherst, Biology<br>Irwin, Rebecca; North Carolina State University, Department of Applied Ecology<br>McArt, Scott; Cornell University, Entomology<br>Adler, Lynn; University of Massachusetts Amherst, Biology |
| Subject:                      | Ecology < BIOLOGY, Health and Disease and Epidemiology < BIOLOGY                                                                                                                                                                                                                                                                                                                                                                                                                                                                                                                                                                                                                             |
| Keywords:                     | <i>Bombus impatiens</i> , <i>Crithidia bombi</i> , pollinator health, disease spread, floral morphology                                                                                                                                                                                                                                                                                                                                                                                                                                                                                                                                                                                      |
| Proceedings B category:       | Ecology                                                                                                                                                                                                                                                                                                                                                                                                                                                                                                                                                                                                                                                                                      |
|                               |                                                                                                                                                                                                                                                                                                                                                                                                                                                                                                                                                                                                                                                                                              |

SCHOLARONE™  
Manuscripts

1  
2  
3  
4  
5  
6  
7  
8  
9  
10  
11  
12  
13  
14  
15  
16  
17  
18  
19  
20  
21  
22  
23

**Mechanisms mediating bee pathogen transmission: deposition, persistence and acquisition  
on flowers**

Laura L. Figuroa<sup>1\*</sup>, Malcolm Blinder<sup>2</sup>, Cali Grincavitch<sup>2</sup>, Angus Jelinek<sup>2</sup>, Emilia K. Mann<sup>2</sup>,  
Liam A Merva<sup>2</sup>, Lucy E. Metz<sup>2</sup>, Amy Y. Zhao<sup>2</sup>, Rebecca E. Irwin<sup>3</sup>, Scott H. McArt<sup>1</sup> and Lynn S.  
Adler<sup>2</sup>

<sup>1</sup>Department of Entomology, Cornell University, Ithaca, NY 14853, USA

<sup>2</sup>Department of Biology, University of Massachusetts, Amherst, MA, 01003, USA

<sup>3</sup>Department of Applied Ecology, North Carolina State University, 127 David Clark Labs,  
Raleigh, NC 27695 USA

\* Corresponding author: [llf44@cornell.edu](mailto:llf44@cornell.edu)

24 **Abstract**

25 Infectious diseases are a primary driver of bee decline worldwide, but limited understanding of  
26 how pathogens are transmitted hampers effective management. Flowers have been implicated as  
27 hubs of bee disease transmission, but we know little about how interspecific floral variation  
28 affects transmission dynamics. Using bumble bees (*Bombus impatiens*), a trypanosomatid  
29 pathogen (*Crithidia bombi*), and three plant species varying in floral morphology, we assessed  
30 how host infection and plant species affect pathogen deposition on flowers, and plant species and  
31 flower parts impacted pathogen survival and acquisition at flowers. We found that host infection  
32 with *Crithidia* increased defecation rates on flowers, and that bees deposited feces onto bracts of  
33 *Lobelia siphilitica* and *Lythrum salicaria* more frequently than onto *Monarda didyma* bracts.  
34 However, *Crithidia* mortality after deposition was higher on *Lobelia* and *Lythrum* than *Monarda*  
35 flowers. Among flower parts, bracts were associated with lowest pathogen survival but highest  
36 resulting infection intensity in bee hosts. These results suggest the efficiency of pathogen  
37 transmission depends on where deposition occurs and the timing and place of acquisition, which  
38 varies among plant species. This information could be utilized for development of wildflower  
39 mixes that maximize forage while minimizing disease spread.

40

41 **Keywords:** *Bombus impatiens*; *Crithidia bombi*; pollinator health; disease spread; floral  
42 morphology

43

## 44 **Introduction**

45 Infectious diseases are a global concern for both humans and wildlife, with examples ranging  
46 from the shifting ecology of Ebola virus [1] to the rapid and devastating expansion of the chytrid  
47 fungus in amphibian populations [2]. Pathogens are one of the primary threats to pollinator  
48 health [3]. However, how infectious diseases spread across pollinator communities is poorly  
49 understood, limiting effective conservation. Specifically, the mechanisms mediating bee  
50 pathogen transmission through shared use of flowers are largely unknown [4, 5], despite flowers  
51 being linked to pathogen spillover and spread [6]. Increasing dependence on bees for crop  
52 pollination heightens the urgency to understand disease transmission dynamics [7].

53

54 Effective disease transmission requires that pathogens be deposited onto a plant species and  
55 flower part where they can survive long enough to be encountered by, acquired, and infect new  
56 susceptible hosts. Recent findings that transmission rates vary across flower species and floral  
57 traits [5, 8, 9] show that infected foraging bees can transmit disease to susceptible bees that  
58 subsequently visit the same flowers [8, 9]. Yet the mechanisms governing how pathogen  
59 transmission occurs on flowers, including deposition, survival, and acquisition of bee pathogens,  
60 are largely unknown. Such information could help us predict which plants are more likely than  
61 others to function as disease hubs, which is important given the increasing role that wildflower  
62 plantings play in pollinator protection efforts [10].

63

64 Infection can alter behavior and physiology in ways that facilitate or impede disease spread. For  
65 example, infection can induce changes in the social network of ant colonies in ways that suppress  
66 pathogen transmission [11]. Conversely, honey bees infected with the fecal-orally transmitted

67 microsporidian *Nosema apis* often present symptoms of dysentery, which facilitates spread  
68 within the colony [12]. Whether infection-induced changes could influence defecation rates on  
69 flowers is unknown. Bumble bees infected with *Crithidia bombi*, a fecal-orally transmitted  
70 trypanostomatid pathogen, are cognitively impaired [13] and less efficient foragers [14, 15],  
71 spending more time learning floral information and consequently visiting each flower for more  
72 time. Either of these mechanisms, physiologically induced defecation or altered foraging  
73 patterns, could result in more feces deposited on flowers by infected bees. Whether infection  
74 affects bee defecation patterns on flowers and how this varies across plant species represents a  
75 serious knowledge gap in bee disease transmission dynamics.

76

77 The ways bees interact with flowers vary greatly across floral morphologies and architectures,  
78 and depend on traits of the bees themselves, such as body size. Depending on the interaction  
79 between a bee and a flower, defecation patterns and pathogen deposition may be altered [4].  
80 Moreover, bee size is highly variable across and within bee species, and may play an important  
81 role in pathogen deposition on flowers [5]. For example, small bodied bees may fit entirely  
82 within flowers with long tubular corollas, resulting in higher likelihood of pathogen deposition  
83 inside the corolla tube than for larger bees that can only access the nectar at the end of the  
84 tubular corolla via their proboscis. Conversely, for flowers with short corollas, bee feces may be  
85 unlikely to be deposited inside the corolla regardless of bee size, but instead may fall onto the  
86 bract subtending the flower, or onto other flowers in the inflorescence. These deposition  
87 dynamics could have consequences for pathogen survival and transmission, but the role of floral  
88 morphology and architecture in mediating host-pathogen dynamics is largely unknown.

89

90 Once deposited, horizontally transmitted pathogens depend on environmental conditions to  
91 remain infectious before being encountered by a new host. For example, the bee microsporidian  
92 *Nosema apis* can remain infectious up to six years under optimal conditions, but loses infectivity  
93 within hours when exposed to ultra-violet (UV) radiation [16]. Similarly, bumble bees develop a  
94 stronger infection when inoculated with freshly prepared *Crithidia bombi* compared to inoculum  
95 that has been stored for 45 minutes [17]. Depending on where pathogens are deposited on a  
96 plant, their exposure to UV radiation and phytochemicals may vary (e. g., inside a corolla tube  
97 compared to an exposed petal). Moreover, pollen and nectar phytochemicals can have growth-  
98 inhibitory effects on *C. bombi* [18], and floral volatiles can kill certain plant pathogens [19].  
99 Therefore, we predicted that pathogen survival and infectiousness would vary across parts within  
100 the same plant and across species.

101  
102 We evaluated multiple mechanisms hypothesized to contribute to bee disease transmission  
103 through shared use of flowers. Specifically, we investigated whether: (1) infection influences  
104 fecal deposition on flowers; (2) the frequency of feces deposited varies with plant species and  
105 flower part (inside the corolla, outside the corolla, flower bract and leaves); (3) pathogen survival  
106 depends on pathogen deposition and environmental conditions across flower parts; and (4)  
107 differences in flower part among plant species affect pathogen acquisition and subsequent  
108 infection intensity in bees. This study lies at the intersection of bee foraging ecology and  
109 epidemiology, and aims to expand the current understanding of bee disease transmission.

110

## 111 **Materials and methods**

112

## 113 (a) Study system

114 All experiments were conducted using common eastern bumble bee (*Bombus impatiens*) workers  
115 and the trypanosome *Crithidia bombi*. Native to eastern North America, *Bombus impatiens*  
116 (Hymenoptera, Apidae) is an abundant generalist bee, frequently used for commercial pollination  
117 [20]. The pathogen *Crithidia bombi* (Kinetoplastea; Trypanosomatida; hereafter *Crithidia*) is a  
118 horizontally transmitted gut pathogen known to reduce bumble bee foraging efficiency and  
119 increase mortality under stressful conditions, and is associated with reduced reproduction in wild  
120 bumble bee colonies [14, 21, 22]. All experiments were conducted using *Crithidia* from wild *B.*  
121 *impatiens* workers collected in Massachusetts, USA (GPS: 42°22'17.53"N 72°35'13.52"W) and  
122 maintained in laboratory bumble bee colonies (Biobest, Leamington, Ontario); infected colonies  
123 were only used as source of inoculum and not as source of bees in experimental trials. For the  
124 duration of the experiments, we conducted weekly pathogen screenings of 5 bees from each  
125 experimental colony to ensure colonies were *Crithidia*-free. *Crithidia bombi* species identity was  
126 verified by sequencing the 18S rRNA [23].

127

128 This study compared three plant species that are visited by bumble bees in northeastern North  
129 America and vary in their floral morphology and architectures: *Monarda didyma* (Lamiaceae),  
130 *Lobelia siphilitica* (Campanulaceae), and *Lythrum salicaria* (Lythraceae), hereafter *Monarda*,  
131 *Lobelia*, and *Lythrum* (Figure 1). *Monarda* and *Lobelia* are native to eastern North America,  
132 whereas *Lythrum* is a non-native species introduced from Europe that is highly abundant and  
133 attractive to pollinators [24].

134

## 135 (b) Experimental protocol



136 (i) Experiment 1: Effect of plant species and infection status on bee defecation patterns across  
137 flower parts

138 To evaluate the role of infection on bee defecation across plant species, we infected bees with  
139 *Crithidia*. The *Crithidia* inoculum used in the trials was prepared fresh daily by dissecting the  
140 gut of infected bees maintained in the laboratory and combining with Ringer's solution (Sigma-  
141 Aldrich, St. Louis, MO) to create a solution with 1200 cells/ $\mu\text{l}$ , which was then mixed with equal  
142 amount of 50% sucrose solution to create an inoculum with 25% sucrose and 600 cells per  $\mu\text{l}$   
143 [25]. We used 25% sucrose in Ringer's solution without *Crithidia* for a control (sham) inoculum.  
144 We selected 18 bees from each of three experimental colonies. Half were infected, while the  
145 other half were sham-infected, for a total of 54 bees inoculated each date (13 days: July 10, 12,  
146 16, 19, 21, 26, and 28, and August 1, 3, 9, 10, 17 and 21, 2017), by feeding 10  $\mu\text{l}$  of inoculum or  
147 sucrose solution using a micropipette. Three similarly-sized bees of the same treatment and  
148 colony were maintained in microcolony containers with 30% sucrose and pollen provided *ad*  
149 *libitum* for 7–12 days prior to trial to allow infection to develop [26].

150  
151 To determine defecation patterns, bees were given sucrose mixed with fluorescent dye (2.5 g of  
152 fluorescent powder (Dayglo Color, Cleveland, OH) dissolved in 500 mL of 30% sucrose) *ad*  
153 *libitum* 24 – 48h prior to field trials. Defecation trials were conducted during summer 2017  
154 (*Monarda* July 10 – 19, *Lythrum* July 21 – August 3, *Lobelia* August 9 – 21). The day of the  
155 trial, bees were cooled at 4 °C and transported in a cooler to the field site in Massachusetts  
156 (42°28'45.5" N, 72°34'46.06"W). Each trial consisted of a single flight cage (45.7 cm x 71.0 cm  
157 x 55.6 cm) in which three clipped field-grown inflorescences were placed in tubes with water,  
158 held upright by tube racks. The number of flowers per inflorescence was held constant within

159 species. The bottom of each cage was lined with newspaper, which was replaced before each  
160 trial to eliminate cross contamination across trials. Cooling bees prior to trials facilitated  
161 foraging. Due to mortality during the period in which infection was allowed to grow, not all trials  
162 included three bees; there was no difference in mortality between infected and uninfected bees  
163 ( $\chi^2_1 = 0.11, p = 0.742$ ), nor did number of bees in a trial affect defecation patterns ( $\chi^2_1 = 1.32, p$   
164  $= 0.250$  and  $\chi^2_1 = 1.67, p = 0.200$  for presence/absence and number of fecal droplets,  
165 respectively). The number of bees and time when each bee was placed in a cage and started  
166 foraging were noted. If bees did not forage within 15 minutes, a flower was raised towards the  
167 bees to induce foraging (20% of bees were induced). If presentation of the flower did not induce  
168 foraging, that trial was excluded from the experiment. Cages were checked for bee feces three  
169 hours after foraging began; the cage was brought into a darkened barn and a handheld black light  
170 was used to count the number of fluorescent fecal droplets on each plant part (Escolite UV  
171 Flashlight Black Light, 51 LED 395 nM). The plant parts were divided into four categories:  
172 “inside” the flower (inside the corolla), “outside” the flower (surface of the corolla), on the bract  
173 (on the modified leaf subtending the inflorescence), or on a leaf (excluding the bract; Figure 1).  
174 We also recorded feces elsewhere in the cage, to determine the proportion of feces deposited on  
175 plants for each plant species. Post-trial, bees were returned to the lab and maintained on 30%  
176 sucrose until the following day, when they were dissected to confirm infection status. We  
177 removed the right forewing and measured marginal cell length as a proxy for bee size [27].

178

179 *Statistical analyses*

180

181 Data analyses were conducted using R studio (R version 3.5.1) with the lme4 and lsmeans  
182 packages [28-30]. We excluded trials for bees that were inoculated but did not develop infection  
183 ( $n = 3$ ) and control trials in which bees developed infection ( $n = 3$ ), for a resulting sample size of  
184  $n = 163$  trials (*Lobelia*  $n = 54$ , *Lythrum*  $n = 61$ , and *Monarda*  $n = 48$ ). To evaluate the factors that  
185 predicted defecation, we constructed a generalized linear mixed model (GLMM) that evaluated  
186 feces on plant (presence/absence) as the response, predicted by bee infection status  
187 (infected/uninfected), plant species, average bee size, and number of bees in the trial. To  
188 determine whether bees were defecating differently across parts of the plant, we developed a  
189 GLMM that included number of fecal droplets as the response variable and evaluated part (inside  
190 of flower, outside of flower, bract, or leaf), infection status (infected/uninfected), plant species,  
191 average bee size, and number of bees in trial as explanatory variables. Both models included  
192 observation level (trial), experimental colony, and date as random effects, and fit a Poisson  
193 distribution, which is suitable for count data [31]. Experimental colony did not explain variance  
194 in either model and affected convergence, so was removed from subsequent analyses. No  
195 variable in the model produced a Variance Inflation Factor (VIF) greater than two, indicating  
196 low co-linearity [32]. To determine the role of each explanatory variable, we employed a  
197 likelihood ratio test to compare the full model to identical models that excluded the variable in  
198 question. Significance of interactions was determined by comparing the original model with and  
199 without interactions (flower part by either average bee size, plant species, or infection status); we  
200 removed non-significant interactions. Significant interactions were evaluated using the *lstrends*  
201 function [29].

202

203 (ii) Experiment 2: *Crithidia* survival across plant species and flower parts

204 Pathogen survival was evaluated across plant species and parts on flowers. We made *Crithidia*  
205 inoculum based on realistic fecal volumes and sugar concentrations; we did not consider other  
206 nutrients or compounds that may be in feces. We used Ringer's solution, a saline solution often  
207 used to study insect physiology [33], as we expected it would be a more realistic proxy for bee  
208 feces than water. We determined realistic fecal volumes by placing 10 worker *Bombus impatiens*  
209 in individual vials for 2 – 4 hours and measuring fecal volume using microcapillary tubes  
210 (Sigma–Aldrich: 20  $\mu$ l). The largest volume observed was 33  $\mu$ l, so we used 35  $\mu$ l of *Crithidia*  
211 inoculum in trials, representing the upper limit of realistic fecal quantity. Given *Crithidia*'s  
212 susceptibility to sugar [34], we evaluated the sugar concentration of bee feces using a  
213 refractometer. The values ranged from 0 – 1% sugar, and so, unlike Experiment 1 and 3, no  
214 sugar was added to inoculum.

215  
216 Trials were conducted during summer 2017. Inoculum was made fresh each trial day, with at  
217 least 3,300 *Crithidia* cells per microliter of Ringer's solution (mean: 3,617, range 3,300 – 3,900);  
218 this high concentration was chosen for ease of visualization in the hemocytometer. We used the  
219 same three plant species from Experiment 1, each evaluated in one day: *Monarda* (July 12),  
220 *Lythrum* (July 21), and *Lobelia* (August 1). Because environmental conditions and inoculum  
221 strength varied between days, and flower species did not have co-occurring blooming periods,  
222 we are not able to compare viability across plant species. Flowers were bagged in the field two  
223 days prior to trial to avoid pathogen deposition from foraging bees. On the day of the trial,  
224 inflorescences were cut, individually marked, and placed in tubes with water. The experiment  
225 was conducted in large covered hexagonal tents (71 x 160.5 in). To evaluate the effect of the sun,  
226 one tent had a UV-protected cover while the other had a mesh cover that allowed UV exposure

227 but prevented wild bees from entering. *Monarda* was only evaluated in shaded (UV-protected)  
228 conditions due to rainy and overcast weather. Within each tent, we measured the temperature,  
229 relative humidity (AcuRite, 01083 Pro Accuracy Indoor Temperature and Humidity Monitor),  
230 and ultraviolet radiation (Apogee instruments, MU-100).

231  
232 We placed 35  $\mu$ l of inoculum on two parts of each inflorescence (inside corolla and bract;  
233 exception was *Monarda* where we also evaluated outside the corolla). We evaluated pathogen  
234 survival for three hours, taking five inflorescences every 30 minutes into the laboratory, where  
235 the inoculum on each part was pipetted into a hemocytometer to count mobile *Crithidia*. We did  
236 not evaluate infectivity of *Crithidia*, using mobility instead as a proxy for survival, in part  
237 because infectiousness of *Crithidia* is highly variable, even within a single day [35]. If the  
238 inoculum evaporated, we pipetted 10  $\mu$ l of distilled water onto the part to collect any *Crithidia*  
239 cells and checked for mobile *Crithidia*; we were successful in detecting mobile *Crithidia* in some  
240 instances when the inoculum had visibly evaporated. The sample size for the shaded samples  
241 were: *Lobelia* n = 58 parts (29 inflorescences), *Lythrum* n = 60 (30 inflorescences), and *Monarda*  
242 n = 88 (31 inflorescences). The sample sizes for sun-exposed plants were: *Lobelia* n = 58 (29  
243 inflorescences) and *Lythrum* n = 60 (30 inflorescences).

244  
245 *Statistical analyses*

246  
247 We conducted survival analyses using Cox proportional hazards mixed-models via the coxme  
248 package in RStudio [30, 36]. The survival analysis evaluated *Crithidia* survival (count of moving  
249 cells per 0.02  $\mu$ l) by time elapsed when the flower was inspected for each of the three plant

250 species. The model included part on flower and shade treatment as explanatory variables, as well  
251 as individual plant as the random effect. To determine significance of the treatments (flower part  
252 and shade), we conducted a likelihood ratio test comparing the full model of each species with a  
253 model that included the same random effect structure but excluded either explanatory variable or  
254 included an additive relationship instead of an interaction. Differences in survival across flower  
255 parts were determined *post hoc* with Tukey's HSD using the *lsmeans* function [29].

256

257 (iii) Experiment 3: Effects of plant species and flower part on pathogen acquisition and  
258 subsequent intensity of infection

259 We evaluated the effect of plant species and flower part on *Crithidia* transmission by placing  
260 pathogen inoculum on flowers, allowing uninfected bees to forage, and subsequently  
261 determining infection (presence/absence and intensity) in the bees. Trials were conducted in  
262 2016 on *Monarda* (June 30 – July 15), *Lythrum* (July 18 – Aug 9), and *Lobelia* (Aug 18 – 26).  
263 Experimental bees and inoculum were transported to the field site in a cooler with insulated ice  
264 packs. We used bees from 4 experimental colonies for *Monarda*, 5 for *Lythrum*, and 6 for  
265 *Lobelia*; colonies mostly overlapped for the first two species and had approximately 50% overlap  
266 for the second and third species. For each trial, we collected an inflorescence of the target species  
267 at the field site and placed it in a tube filled with water. Each trial was randomly assigned to one  
268 of three treatments of inoculum placement: inside corolla, outside corolla, or bract. For all the  
269 treatments, we added four 10 µl drops of inoculum (see Experiment 1 for inoculum preparation)  
270 on the inflorescence in the specified treatment part using a micropipette (Figure 1); inoculated  
271 flowers were marked using a paint pen. Inflorescences were from field-grown plants that were  
272 bagged with mesh for at least two days prior to trials to prevent *Crithidia* deposition from wild

273 foraging bees. We placed the prepared inflorescence in a small flight cage and released a single,  
274 chilled worker bee into the cage (see Experiment 1 for cage details). We allowed the bee to  
275 forage and recorded total time spent foraging (i.e., probing flowers, not including time moving  
276 between flowers), number of flowers probed, and number of drops probed. We also recorded the  
277 time of the trial so that we could calculate elapsed time between inoculum preparation and each  
278 trial for use as a covariate. When the bee stopped foraging (usually a clear change in behavior  
279 from probing flowers to flying around the cage), we recaptured it in a vial. Bees were excluded if  
280 they did not probe any inoculum drops or foraged for less than thirty seconds.

281  
282 Bees were collected and subsequently maintained individually for one week in the laboratory to  
283 allow infection to develop. We fed each bee daily 500  $\mu$ l of 30% sucrose solution and a ~0.15 g  
284 pollen ball (30% sucrose and commercial mixed wildflower pollen (Koppert Biological Systems;  
285 Linden Apiaries, Walpole, NH, USA)). We maintained the bees in an incubator set at 27 °C in  
286 darkness. After seven days, we dissected each bee and placed the gut in 300  $\mu$ l of Ringer's  
287 solution. The mixture was allowed to incubate for four hours before *Crithidia* was quantified  
288 using a hemocytometer [25]. We removed the right forewing and measured marginal cell length  
289 as a proxy for size [27]. Sample sizes for each species were n = 40 bees for *Monarda*, n = 67 for  
290 *Lythrum*, and n = 89 for *Lobelia*.

291  
292 *Statistical analyses*

293  
294 Data analyses were conducted using R studio with packages lme4, DHARMA,  
295 RVAidememo and lsmeans [28-30, 37, 38]. To manage zero-inflated and overdispersed count

296 data, we used manual two-step hurdle models [39]. We first evaluated an “incidence” model  
297 (evaluating presence or absence of *Crithidia* infection), followed by an “intensity” model  
298 (*Crithidia* counts of the infected bees). In the first step, we modeled pathogen incidence using a  
299 binomial distribution (logit link), given the binary outcome of whether bees were infected or not.  
300 Next, we modeled *Crithidia* intensity when present (i.e., the non-zero outcomes) with a Poisson  
301 distribution (log link). We evaluated overdispersion in the Poisson model using the  
302 *overdisp.glmer* function in the RVAideMemoire package [38]. To ensure our data were well-  
303 modeled by the specified distributions and to check model assumptions, we used the DHARMA  
304 package [37]. Our incidence model was evaluated using a GLMM, with presence or absence of  
305 infection as the response variable, predicted by flower part, plant species, their interaction, bee  
306 size, foraging time, and time since the inoculum was made (related to its infectiousness). The  
307 model included colony and date as random effects. The intensity model had the same random  
308 effect structure as the incidence model, plus an observation-level random effect to correct for  
309 overdispersion [40]. To determine significance, we conducted a likelihood ratio test by  
310 comparing the full GLMM model to a model that excluded the factor of interest. Significant  
311 factors were determined *post hoc* with Tukey’s HSD using the *lsmeans* function [29].

312

## 313 **Results**

314

315 (i) Experiment 1: Effect of plant species and infection status on bee defecation patterns across  
316 flower parts

317 Overall, bees defecated on plants in 65% of trials. Infected bees were more likely to defecate on  
318 plants than uninfected bees ( $\chi^2_1 = 4.26$ ,  $p = 0.039$ ; Figure 2), although there was no relationship



319 between infection status and the number of fecal droplets observed ( $\chi^2_1 = 1.05, p = 0.306$ ) or  
320 where bees defecated ( $\chi^2_3 = 3.78, p = 0.287$ ). Flower part significantly predicted the number of  
321 fecal droplets observed ( $\chi^2_4 = 23.05, p < 0.001$ ). Moreover, we found a strong plant species by  
322 part interaction ( $\chi^2_6 = 166.74, p < 0.001$ ; Figure 3a and Table S1), such that the most deposition  
323 occurred on leaves and bracts for *Lobelia*, on bracts and inside the flower for *Lythrum*, and  
324 outside the flower for *Monarda*. We observed a bee size by flower part interaction for number of  
325 fecal droplets observed ( $\chi^2_3 = 9.08, p = 0.028$ ; Figure 3b), whereby bigger bees defecated fewer  
326 times inside flowers (Tukey HSD:  $z = -2.87, p = 0.004$ ). Plant species and average bee size did  
327 not predict presence or number of fecal droplets observed on flowers ( $\chi^2_2 = 1.32, p = 0.517$  and  
328  $\chi^2_1 = 0, p = 0.991$  respectively for presence of feces;  $\chi^2_2 = 0.978, p = 0.614$  and  $\chi^2_1 = 0.50, p =$   
329  $0.478$  respectively for number of fecal droplets). Bee size had no relationship with number of  
330 fecal droplets observed on the outside of the flower, on the bract, or on leaves ( $z = 1.55, p =$   
331  $0.122, z = 1.11, p = 0.268$  and  $z = 1.34$  and  $p = 0.180$ , respectively). The proportion of total fecal  
332 droplets that landed on the plants (compared to elsewhere in the cage) varied across plant species  
333 ( $\chi^2_2 = 28.65, p < 0.001$ ), being 0.55, 0.29 and 0.25 for *Lobelia*, *Lythrum*, and *Monarda*  
334 respectively.

335

336 (iii) Experiment 2: *Crithidia* survival across plant species and flower parts

337

338 *Crithidia* became non-motile within three hours of placement on flowers in 71% of trials.

339 Furthermore, mortality varied by plant species ( $\chi^2_1 = 0.001, p < 0.001$ ), at 90% for *Lobelia*, 90%

340 for *Lythrum* and 20% for *Monarda*. *Crithidia* survival was influenced by flower part on all plant

341 species ( $\chi^2_1 = 4.67, p = 0.031, \chi^2_1 = 5.49, p = 0.019$  and  $\chi^2_2 = 6.30, p = 0.043$  for *Lobelia*,

342 *Lythrum*, and *Monarda* respectively; Figure 4a, b). For *Lobelia* and *Lythrum*, *Crithidia* survived  
343 longer inside the corolla than on the bract (Tukey HSD test:  $z = 2.09$ ,  $p = 0.037$  and  $z = 2.29$ ,  $p =$   
344  $0.022$  for *Lobelia* and *Lythrum* respectively). *Post hoc* evaluation of *Crithidia* survival across  
345 parts on *Monarda* flowers did not yield significant pairwise comparisons (Table S2), likely due  
346 to low overall mortality in this species. *Crithidia* survival was also greater in shaded than sunny  
347 conditions ( $\chi^2_1 = 6.87$ ,  $p = 0.009$  and  $\chi^2_1 = 4.53$ ,  $p = 0.033$  for *Lobelia* and *Lythrum* respectively;  
348 Figure 4c, d). There was no flower part by sun exposure interaction in either species ( $\chi^2_1 = 0.02$ ,  
349  $p = 0.892$  and  $\chi^2_1 = 1.48$ ,  $p = 0.223$ , for *Lobelia* and *Lythrum*, respectively).

350

351 (ii) Experiment 3: Effects of plant species and flower part on *Crithidia* acquisition and  
352 subsequent intensity of infection

353 The probability of becoming infected did not depend on plant species, part where inoculum was  
354 placed, their interaction, or bee size ( $\chi^2 < 4.68$ ,  $p > 0.137$  for all). However, part on flower did  
355 predict *Crithidia* intensity for the infected bees ( $\chi^2_2 = 13.66$ ,  $p = 0.001$ ; Figure 5). Specifically,  
356 when bees picked up inoculum on the bract of a flower, they developed a more intense *Crithidia*  
357 infection than if they encountered the pathogen on the outside of the flower (Tukey HSD:  $z =$   
358  $3.77$ ,  $p < 0.001$ ). Similarly, bees developed a marginally more intense *Crithidia* infection when  
359 encountered on the bract than the inside of the flower ( $z = 2.29$ ,  $p = 0.057$ ). There was no  
360 difference in infection intensity between the inside and outside of the flower ( $z = 1.35$ ,  $p =$   
361  $0.370$ ). For infected bees, bee size did not explain *Crithidia* intensity ( $\chi^2_1 = 0.83$ ,  $p = 0.363$ ), nor  
362 did plant species ( $\chi^2_2 = 1.01$ ,  $p = 0.602$ ), or plant species by flower part interaction ( $\chi^2_4 = 4.54$ ,  $p$   
363  $= 0.338$ ).

364

**365 Discussion**

366 The intersection of bee foraging ecology and epidemiology is a novel area of research that can  
367 give rise to new understanding of pollinator disease spread and evidence-based conservation  
368 strategies. Here we show that foraging bumble bees often defecate on plants, and do so more  
369 when they are infected with *Crithidia* (Figure 2). There is not a universal part on plants where  
370 bees are more likely to defecate. That pattern depends on plant species, which may in turn be  
371 related to floral traits, such as shape or size. These deposition dynamics are also influenced by  
372 bee traits, with bigger bees defecating fewer times inside flowers (Figure 3b), possibly because  
373 they are too large to fit inside the flowers. Similarly, for pathogen survival on flowers, we found  
374 differences across flower parts for some species but not for others (Figure 4a). Moreover, the  
375 flower part where inoculum is encountered influenced the intensity of the resulting infection  
376 (Figure 5), further highlighting the complexity of bee pathogen transmission dynamics via  
377 flowers. Taken together, these data suggest variation in plant-pollinator interaction patterns, from  
378 encounter rates to trait matching, are expected to influence pathogen transmission and warrant  
379 further research.

380

381 Bees defecated on plants in 65% of trials, and did so significantly more when infected with  
382 *Crithidia* (Figure 2). Increased likelihood of defecation on plants could hasten the spread of  
383 multiple diseases, especially because bumble bees are often infected with several fecal-orally  
384 transmitted pathogens [16, 41]. Whether the increased defecation is a by-product of dysentery, as  
385 in honey bees infected with *Nosema apis* [12] or due to increased time spent on each flower by  
386 infected bees [15, 35], remains unknown.

387

388 We found a plant species by part interaction on the number of fecal droplets observed, such that  
389 each plant species had a different part where droplets were most likely to be found (Figure 3a).  
390 Differential handling of the flowers across plant species could have led to this pattern, especially  
391 given the diversity of floral morphologies and plant architectures (Figure 1). For *Monarda*  
392 (Figure 1c), the inside of the small floral tube is only accessible to the bee proboscis, likely  
393 explaining why we seldom observed feces there, compared to the outside of the corolla where the  
394 bees crawl to reach subsequent flowers. Similarly, *Lobelia* (Figure 1a) rarely had feces inside of  
395 the flower, despite an entirely different floral morphology. The floral tube of *Lobelia* is quite  
396 large, such that the entire head of the bees can fit inside, but usually the abdomen protrudes,  
397 enabling defecation onto leaves or bracts subtending the flower. However, the smallest bees in  
398 the trials fit entirely within the *Lobelia* flowers, likely contributing to the bee size by part  
399 interaction. *Lythrum* differed in that it often had feces on the inside of its flowers. This is likely  
400 because the tube of *Lythrum* is extremely short and narrow and surrounded by wide, flat petals  
401 (Figure 1b), so that bees will crawl over the entire flower after foraging to reach the next flower.  
402 These differential deposition dynamics across plant species are the first step towards horizontal  
403 transmission, which can result in transferring the pathogen to new colonies via foragers.  
404  
405 Horizontally transmitted pathogens must remain viable to be acquired by a new host. However,  
406 the decay rate of many pathogens outside of their host is unknown [42]. *Crithidia* survived  
407 longer on the inside of the corolla than the bract of *Lythrum* and *Lobelia* flowers (Figure 4a, b).  
408 We had predicted that the inside would provide more protection from desiccation, extending  
409 survival compared to more exposed parts. However, we did not observe that pattern for  
410 *Monarda*, which aligns with the lower overall *Crithidia* mortality on this species. Floral

411 chemistry or other unknown mechanisms could mediate the lack of differences across parts for  
412 this species, as could more humid environmental conditions during the day of trial. In general,  
413 we found that within three hours of being placed on flowers, most *Crithidia* had died.  
414 Incorporating rate of decay between deposition by infected bees and acquisition by the incoming  
415 susceptible foragers could enhance disease spread models [42].

416  
417 Once pathogens have been deposited on the plant, environmental factors could influence  
418 pathogen survival. *Crithidia* on sun-exposed flowers had shorter survival times than shaded  
419 plants (Figure 4c, d). This may be because of UV radiation, temperature, and/or increased  
420 desiccation, all of which were greater in the sun-exposed conditions. Pulsed UV radiation can  
421 decrease *Crithidia* viability [43]. Otterstatter & Thompson experimentally varied the time and  
422 number of *Crithidia* cells placed on *Brassica rapa* nectaries encountered by susceptible foraging  
423 bumble bees. They found that most bees visiting flowers with *Crithidia* became infected when  
424 the delay was less than 10 minutes, but by 85 minutes the probability was less than 15%,  
425 regardless of the dose placed on the flowers [6]. They determined the half-life of *Crithidia* to be  
426 77 minutes, largely mirroring our results. Floral mechanisms that maximize exposure to direct  
427 sunlight, such as heliotropism, could reduce bee pathogen survival on flowers and warrant  
428 further investigation.

429  
430 For bees that developed an infection after foraging on inoculated plants (Experiment 3), those  
431 that encountered inoculum on the bract had more intense *Crithidia* infections than when they  
432 encountered it on the outside of the flower (Figure 5). This pattern may be due to fewer  
433 phytochemicals from nectar and pollen encountered on the bract [44]. For *Lobelia* and *Lythrum*,

434 bumble bees defecated many times on the bract (Experiment 1), which was also the part  
435 associated with the most intense *Crithidia* infection (Experiment 3). However, in this part  
436 *Crithidia* survived shorter amounts of time, and so the ability to transmit *Crithidia* will depend  
437 on how quickly feces are encountered by a new host. *Lythrum* is very frequently visited by bees,  
438 especially *B. impatiens*, in its non-native North American range [24], which could then minimize  
439 the impact of short pathogen survival time and facilitate pathogen spread in the community.  
440 Conversely, foraging bumble bees seldom defecated on *Monarda* bracts, the part that resulted in  
441 the greatest infection intensity. These results suggest *Lobelia* and *Lythrum* may be more effective  
442 disease transmission hubs than *Monarda*, but transmission will also depend on frequency of  
443 visitation.

444

445 In the face of increasing dependence on bees for ecosystem services [7], there is a pressing need  
446 to understand factors that shape pollinator health. Pathogen-induced stress and spillover from  
447 commercial bees via flowers are factors consistently linked to pollinator decline [3, 6], yet the  
448 mechanisms governing how flowers serve as disease transmission venues have been largely  
449 unexplored. Flowers are multifunctional hubs, providing not only nutrition, microbial symbionts  
450 [45], and pathogen-suppressing chemical compounds [25, 46], but also many of the pathogens  
451 themselves [47]. Infection-induced changes in foraging and/or physiology are predicted to affect  
452 probability of transmission [35, 48], but had yet to be empirically evaluated until now.

453 Understanding how flowers contribute to bee pathogen transmission is a necessary component of  
454 promoting pollinator health. Given our results, we recommend assessing floral traits associated  
455 with pathogen transmission across a diversity of plant and pollinator species, in an effort to  
456 develop wildflower mixes that not only maximize forage but also minimize disease spread.

457

458 *Supporting data can be accessed at*459 *<https://datadryad.org/review?doi=doi:10.5061/dryad.jc4hf80>.*

460

461 *We have no competing interests*

462

463 *LLF, LSA, REI and SHM conceived and designed the study; LLF, LSA, MB, CG, AJ, EM, LM,*464 *LM and AZ collected field data and conducted experiments; LLF carried out the statistical*465 *analyses and drafted the manuscript. All authors gave final approval for publication.*

466

467 **Acknowledgements**

468

469 This material is based upon work supported by the National Science Foundation Graduate

470 Research Fellowship under Grant No. DGE–1650441 and the National Institute of General

471 Medical Sciences of the National Institutes of Health under Award Number R01GM122062, as

472 well as research funds from Garden Club of America (GCA) Board of Associates Centennial

473 Pollinator Fellowship and the Atkinson Center for a Sustainable Future Sustainable Biodiversity

474 Fund. The University of Massachusetts at Amherst Summer Pre-College program provided

475 logistical support. The content is solely the responsibility of the authors and does not necessarily

476 represent the official views of the National Institutes of Health or National Science Foundation.

477 We thank Biobest for donating bee colonies, Laura Harrington for support in the methodological

478 design of this experiment and reading a previous draft of the manuscript, Julie Davis and Dana

479 Delaney for field and lab assistance, Neal Woodard for field site preparation, Jeff Boettner and

480 Joe Elkinton for providing the field cages, Quinn McFrederick for the *Crithidia bombi* sequence  
481 data and Nelson Milano for flower photographs.



482 **References:**

- 483 1. Jones K.E., Patel N.G., Levy M.A., Storeygard A., Balk D., Gittleman J.L., Daszak P.  
484 2008 Global trends in emerging infectious diseases. *Nature* **451**(7181), 990.
- 485 2. Lips K.R., Brem F., Brenes R., Reeve J.D., Alford R.A., Voyles J., Carey C., Livo L.,  
486 Pessier A.P., Collins J.P. 2006 Emerging infectious disease and the loss of biodiversity in  
487 a Neotropical amphibian community. *Proc Natl Acad Sci USA* **103**(9), 3165-3170.
- 488 3. Goulson D., Nicholls E., Botías C., Rotheray E.L. 2015 Bee declines driven by combined  
489 stress from parasites, pesticides, and lack of flowers. *Science* **347**(6229).
- 490 4. McArt S.H., Koch H., Irwin R.E., Adler L.S. 2014 Arranging the bouquet of disease:  
491 floral traits and the transmission of plant and animal pathogens. *Ecol Lett* **17**(5), 624-636.
- 492 5. Adler L.S., Michaud K.M., Ellner S.P., McArt S.H., Stevenson P.C., Irwin R.E. 2018  
493 Disease where you dine: plant species and floral traits associated with pathogen  
494 transmission in bumble bees. *Ecology* **99**(11), 2535-2545.
- 495 6. Otterstatter M.C., Thomson J.D. 2008 Does pathogen spillover from commercially reared  
496 bumble bees threaten wild pollinators? *PLoS One* **3**(7), 9.
- 497 7. Aizen M.A., Garibaldi L.A., Cunningham S.A., Klein A.M. 2008 Long-term global  
498 trends in crop yield and production reveal no current pollination shortage but increasing  
499 pollinator dependency. *Curr Biol* **18**(20), 1572-1575.
- 500 8. Durrer S., Schmid-Hempel P. 1994 Shared use of flowers leads to horizontal pathogen  
501 transmission. *Proc R Soc B-Biol Sci* **258**(1353), 299-302.
- 502 9. Graystock P., Goulson D., Hughes W.O.H. 2015 Parasites in bloom: flowers aid dispersal  
503 and transmission of pollinator parasites within and between bee species. *Proc R Soc B-*  
504 *Biol Sci* **282**(1813).
- 505 10. Williams N.M., Ward K.L., Pope N., Isaacs R., Wilson J., May E.A., Ellis J., Daniels J.,  
506 Pence A., Ullmann K., et al. 2015 Native wildflower plantings support wild bee  
507 abundance and diversity in agricultural landscapes across the United States. *Ecol Appl*  
508 **25**(8), 2119-2131.
- 509 11. Stroeymeyt N., Grasse A.V., Crespi A., Mersch D.P., Cremer S., Keller L. 2018 Social  
510 network plasticity decreases disease transmission in a eusocial insect. *Science* **362**(6417),  
511 941-945.
- 512 12. Fries I. 2010 *Nosema ceranae* in European honey bees (*Apis mellifera*). *J Invertebr*  
513 *Pathol* **103**, S73-S79.
- 514 13. Gegear R.J., Otterstatter M.C., Thomson J.D. 2006 Bumble-bee foragers infected by a gut  
515 parasite have an impaired ability to utilize floral information. *Proc R Soc B-Biol Sci*  
516 **273**(1590), 1073-1078.
- 517 14. Otterstatter M.C., Gegear R.J., Colla S.R., Thomson J.D. 2005 Effects of parasitic mites  
518 and protozoa on the flower constancy and foraging rate of bumble bees. *Behav Ecol*  
519 *Sociobiol* **58**(4), 383-389.
- 520 15. Gegear R.J., Otterstatter M.C., Thomson J.D. 2005 Does parasitic infection impair the  
521 ability of bumblebees to learn flower-handling techniques? *Anim behav* **70**(1), 209-215.
- 522 16. Schmid-Hempel P. 1998 *Parasites in social insects*, Princeton University Press.
- 523 17. Schmid-Hempel P., Pühr K., Krüger N., Reber C., Schmid-Hempel R. 1999 Dynamic and  
524 genetic consequences of variation in horizontal transmission for a microparasitic  
525 infection. *Evolution* **53**(2), 426-434.

- 526 18. Palmer-Young E.C., Sadd B.M., Stevenson P.C., Irwin R.E., Adler L.S. 2016 Bumble bee  
527 parasite strains vary in resistance to phytochemicals. *Sci Rep* **6**, 37087.
- 528 19. Huang M., Sanchez-Moreiras A.M., Abel C., Sohrabi R., Lee S., Gershenzon J., Tholl D.  
529 2012 The major volatile organic compound emitted from *Arabidopsis thaliana* flowers,  
530 the sesquiterpene (E)- $\beta$ -caryophyllene, is a defense against a bacterial pathogen. *New*  
531 *Phytol* **193**(4), 997-1008.
- 532 20. Velthuis H.H.W., van Doorn A. 2006 A century of advances in bumblebee domestication  
533 and the economic and environmental aspects of its commercialization for pollination.  
534 *Apidologie* **37**(4), 421-451.
- 535 21. Brown M., Loosli R., Schmid-Hempel P. 2000 Condition-dependent expression of  
536 virulence in a trypanosome infecting bumblebees. *Oikos* **91**(3), 421-427.
- 537 22. Goulson D., O'Connor S., Park K.J. 2018 The impacts of predators and parasites on wild  
538 bumblebee colonies. *Ecol Entomol* **43**(2), 168-181.
- 539 23. Schmid-Hempel R., Tognazzo M. 2010 Molecular divergence defines two distinct  
540 lineages of *Crithidia bombi* (Trypanosomatidae), parasites of bumblebees. *J Eukaryot*  
541 *Microbiol* **57**(4), 337-345.
- 542 24. Flanagan R.J., Mitchell R.J., Karron J.D. 2010 Increased relative abundance of an  
543 invasive competitor for pollination, *Lythrum salicaria*, reduces seed number in *Mimulus*  
544 *ringens*. *Oecologia* **164**(2), 445-454.
- 545 25. Richardson L.L., Adler L.S., Leonard A.S., Andicoechea J., Regan K.H., Anthony W.E.,  
546 Manson J.S., Irwin R.E. 2015 Secondary metabolites in floral nectar reduce parasite  
547 infections in bumblebees. *Proc R Soc B-Biol Sci* **282**(1803), 8.
- 548 26. Schmid-Hempel P., Schmid-Hempel R. 1993 Transmission of a pathogen in *Bombus*  
549 *terrestris*, with a note on division of labour in social insects. *Behav Ecol Sociobiol* **33**(5),  
550 319-327.
- 551 27. Harder L.D. 1982 Measurement and estimation of functional proboscis length in  
552 bumblebees (Hymenoptera: Apidae). *Can J Zool* **60**(5), 1073-1079.
- 553 28. Bates D., Mächler M., Bolker B., Walker S. 2015 Fitting linear mixed-effects models  
554 using lme4. *J Stat Soft* **67**(1), 1-48.
- 555 29. Lenth R.V. 2016 Least-squares means: the R package lsmeans. *J Stat Soft* **69**(1), 1-33.
- 556 30. R Core Team. R: a language and environment for statistical computing. Vienna: R  
557 foundation for statistical computing. Version 3.4.0. (  
558 31. Ellison G., Gotelli N. 2004 A primer of ecological statistics. *Sinauer, Sunderland,*  
559 *Massachusetts, USA*.
- 560 32. O'Brien R.M. 2007 A caution regarding rules of thumb for variance inflation factors.  
561 *Quality & quantity* **41**(5), 673-690.
- 562 33. Alghamdi A., Dalton L., Phillis A., Rosato E., Mallon E.B. 2008 Immune response  
563 impairs learning in free-flying bumble-bees. *Biol Lett* **4**(5), 479-481.
- 564 34. Cisarovsky G., Schmid-Hempel P. 2014 Combining laboratory and field approaches to  
565 investigate the importance of flower nectar in the horizontal transmission of a bumblebee  
566 parasite. *Entomol Exp Appl* **152**(3), 209-215.
- 567 35. Otterstatter M.C., Thomson J.D. 2006 Within-host dynamics of an intestinal pathogen of  
568 bumble bees. *Parasitology* **133**(06), 749-761.
- 569 36. Therneau T.M., Therneau M.T.M. 2015 Package 'coxme'. *Mixed Effects Cox Models R*  
570 *package version 2*.

- 571 37. Hartig F. 2017 DHARMA: residual diagnostics for hierarchical (multi-level/mixed)  
572 regression models. R package version 0.1. 5. (
- 573 38. Hervé M. 2015 RVAideMemoire: diverse basic statistical and graphical functions. R  
574 package version 0.9–32. 2014. (
- 575 39. Zuur A.F., Ieno E.N., Walker N.J., Saveliev A.A., Smith G.M. 2009 Zero-truncated and  
576 zero-inflated models for count data. In *Mixed effects models and extensions in ecology  
577 with R* (pp. 261-293, Springer.
- 578 40. Harrison X.A. 2014 Using observation-level random effects to model overdispersion in  
579 count data in ecology and evolution. *PeerJ* **2**, e616.
- 580 41. Cordes N., Huang W.F., Strange J.P., Cameron S.A., Griswold T.L., Lozier J.D., Solter  
581 L.F. 2012 Interspecific geographic distribution and variation of the pathogens *Nosema  
582 bombi* and *Crithidia* species in United States bumble bee populations. *J Invertebr Pathol*  
583 **109**(2), 209-216.
- 584 42. Richardson T.O., Gorochoowski T.E. 2015 Beyond contact-based transmission networks:  
585 the role of spatial coincidence. *J R Soc Interface* **12**(111).
- 586 43. Naughton J., Tiedeken E.J., Garvey M., Stout J.C., Rowan N.J. 2017 Pulsed light  
587 inactivation of the bumble bee trypanosome parasite *Crithidia bombi*. *J Apic Res* **56**(2).
- 588 44. Palmer-Young E.C., Farrell I.W., Adler L.S., Milano N.J., Egan P.A., Junker R.R., Irwin  
589 R.E., Stevenson P.C. 2019 Chemistry of floral rewards: intra- and interspecific variability  
590 of nectar and pollen secondary metabolites across taxa. *Ecol Monogr* **89**(1), e01335.
- 591 45. McFrederick Q.S., Thomas J.M., Neff J.L., Vuong H.Q., Russell K.A., Hale A.R.,  
592 Mueller U.G. 2017 Flowers and wild megachilid bees share microbes. *Microb Ecol* **73**(1),  
593 188-200.
- 594 46. Manson J.S., Otterstatter M.C., Thomson J.D. 2010 Consumption of a nectar alkaloid  
595 reduces pathogen load in bumble bees. *Oecologia* **162**(1), 81-89.
- 596 47. Singh R., Levitt A.L., Rajotte E.G., Holmes E.C., Ostiguy N., vanEngelsdorp D., Lipkin  
597 W.I., dePamphilis C.W., Toth A.L., Cox-Foster D.L. 2010 RNA viruses in  
598 Hymenopteran pollinators: evidence of inter-taxa virus transmission via pollen and  
599 potential impact on non-*Apis* Hymenopteran species. *PLoS One* **5**(12), e14357.
- 600 48. Koch H., Brown M.J.F., Stevenson P.C. 2017 The role of disease in bee foraging  
601 ecology. *Curr Opin Insect Sci* **21**, 60-67.

602

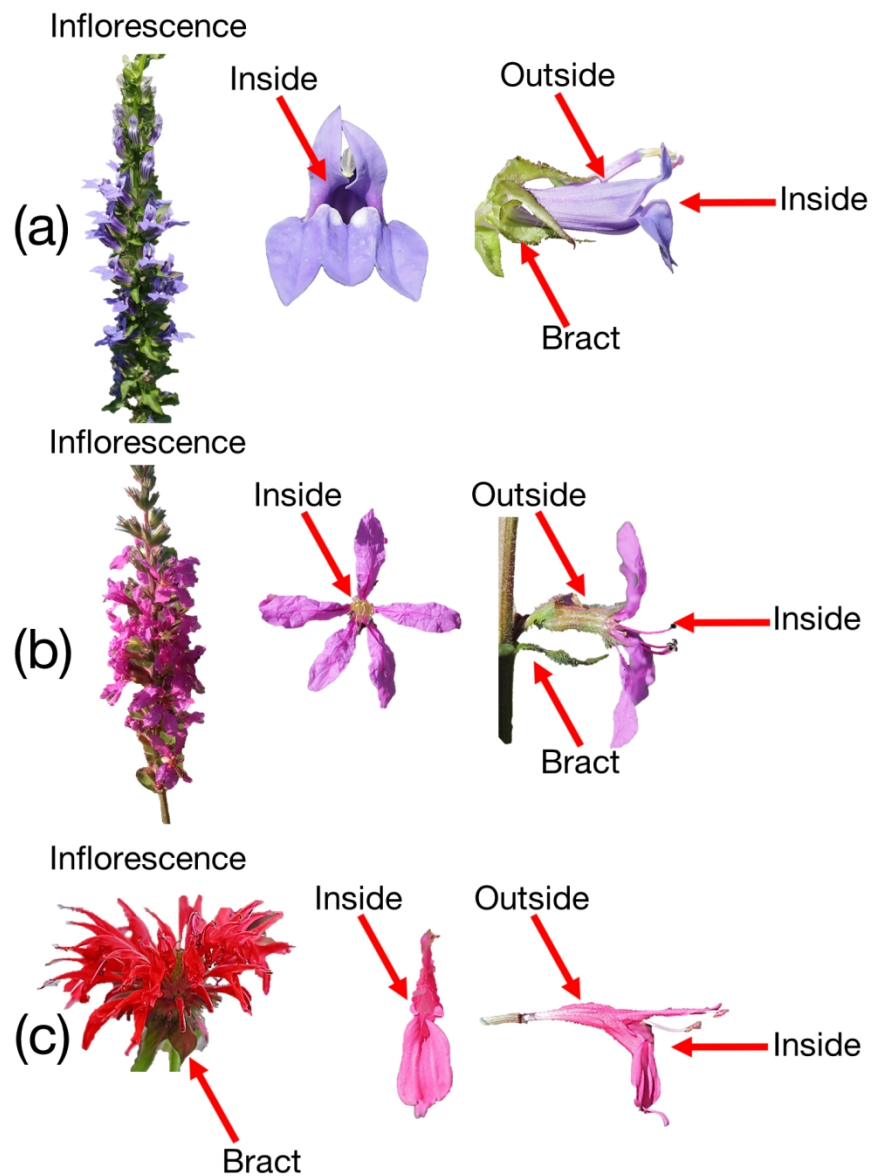

Figure 1: Flower parts where the common eastern bumble bee (*Bombus impatiens*) defecated or *Crithidia bombi* inoculum was placed on (a) *Lobelia siphilitica*, (b) *Lythrum salicaria* and (c) *Monarda didyma* (photo credit: N. Milano).

381x508mm (96 x 96 DPI)

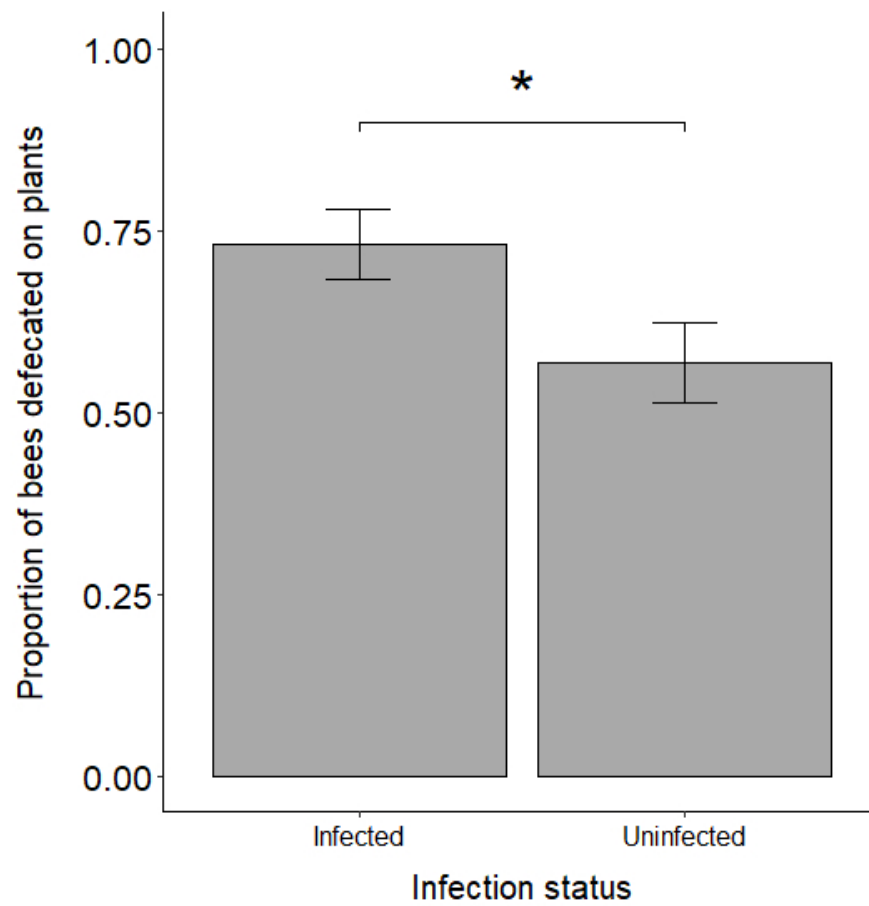

Figure 2. Experiment 1: Effect of *Crithidia* infection status on *Bombus impatiens* defecation rate on plants (mean  $\pm$  s.e). Infected worker bees were more likely to defecate on plants than uninfected bees.

158x158mm (96 x 96 DPI)

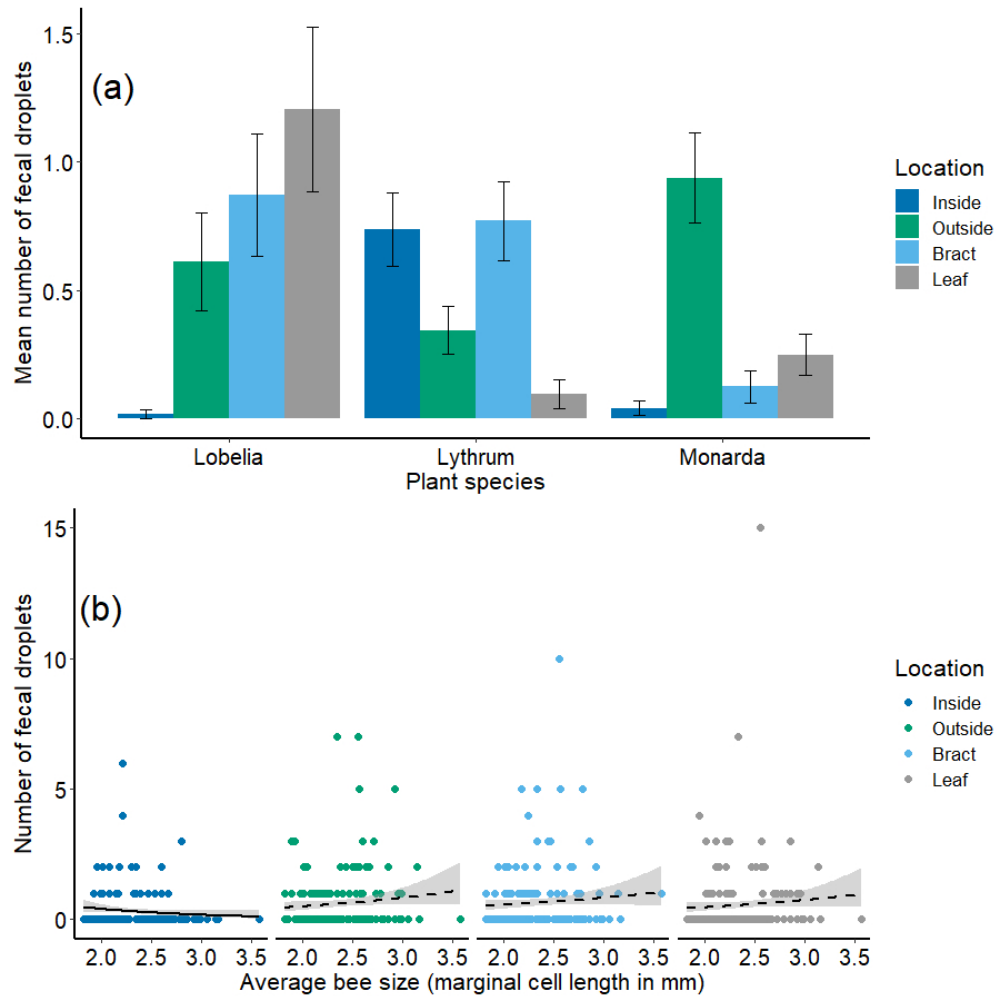

Figure 3. Experiment 1: (a) Effect of plant species and flower part on defecation by *B. impatiens* workers. Data are mean  $\pm$  s.e. (for post-hoc comparisons see Table S1). (b) Effect of *B. impatiens* size on defecation among different flower parts. Solid lines indicate significance ( $p < 0.05$ ) while dashed lines indicate no significant relationship.

238x238mm (96 x 96 DPI)

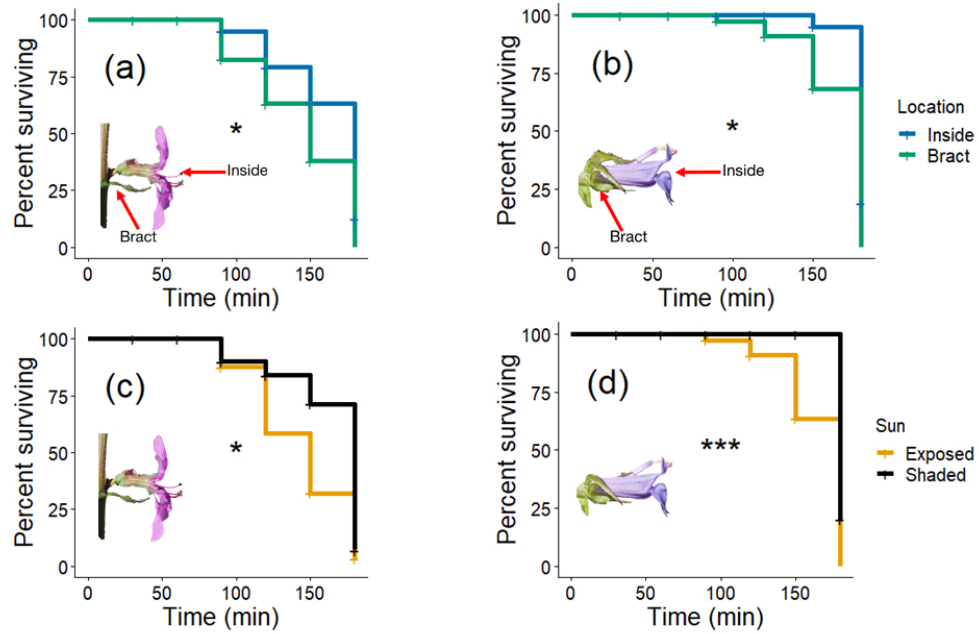

Figure 4. Experiment 2: *Crithidia* survival across plant species and flower parts. Survival differed across flower part and exposure to sun in *Lythrum* (a, c) and *Lobelia* (b, d). We did not find significant differences among flower parts on *Monarda*.

254x193mm (96 x 96 DPI)

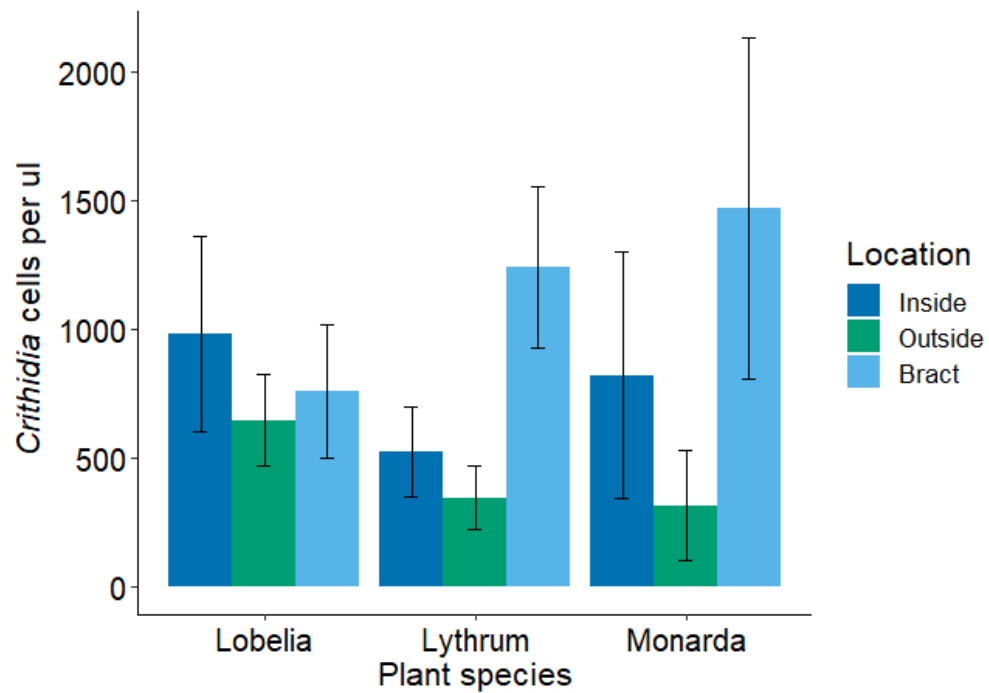

Figure 5. Experiment 3: Effects of plant species and flower part on *Crithidia* acquisition and subsequent intensity of infection (*Crithidia* cells per ul) in *B. impatiens* workers. Data are means  $\pm$  s.e.

170x119mm (96 x 96 DPI)



## Appendix B

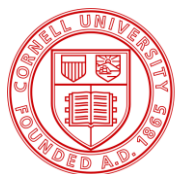

**Cornell University**  
College of Agriculture  
and Life Sciences

Laura L. Figueroa  
Department of Entomology

April 18, 2019

Dear Editor,

Thank you for your decision on our manuscript RSPB-2019-0603, now titled “*Bee pathogen transmission dynamics: deposition, persistence and acquisition on flowers.*” We appreciate the opportunity to revise the manuscript and address reviewer comments, and feel our manuscript is much improved thanks to the reviewers’ efforts.

Below we provide a point-by-point list of our responses to reviewer comments; our responses are in blue italics. Line numbers in our responses refer to the revised manuscript. All authors have approved of the final version of this resubmission.

Thank you for your time and considering our manuscript.

Sincerely and on behalf of all coauthors,

A handwritten signature in blue ink that reads 'Laura Figueroa'.

Laura Figueroa

### **Associate Editor**

#### **Comments to Author:**

The two reviewers were generally positive about this manuscript. They thought the manuscript is well written, the analyses correct and the results interesting and potentially appealing for the broad readership of Proceedings B. At the same time, both reviewers had several suggestions for improvement of the manuscript, particularly Reviewer 2, especially regarding the manuscript's title, the unclear relevance of some of the results, and the need for clarification or revision of parts of the methods, results and discussion sections and one figure (Fig. 4). Minor revisions should allow the authors to incorporate these suggestions.

*Thank you for the opportunity to resubmit our manuscript. We believe we have addressed all of the reviewers’ comments.*

Reviewer(s)' Comments to Author:

**Referee: 1**

Comments to the Author(s)

The manuscript provide interesting information related to acquisition of trypanosomatids parasites on bumblebees. I find the work well performed, with a clear introduction and objectives. I have some doubts that I marked on the third experiment. I have made some minor comments in the file attached.

*Thank you for these positive comments.*

*We addressed all edits provided by Reviewer 1:*

[L45-47] Please delete this phrase, it is too general.

*While we agree the first sentence of the introduction is general, we believe that placing our work in the broader ecology of infectious disease (EID) literature is important given the breadth of this field of study, the insights our study makes to the EID literature, and the broad readership of PRSB. However, if the editor feels otherwise, we can remove this sentence.*

[L54] Replace "effective disease" by "effective bee disease"

*We made this change.*

[L68] Fries (2010) is no the correct citation. You should cite: Bailey, L., 1981. Honey Bee Pathology, second ed. Academic Press, London.

*We now add the proper citation.*

[L264-266] *How authors have assessed this overlapping? please clarify.*

*We clarified the use of overlapping bumble bee colonies on L278-281, by referring to the statistical methods section: "We used bees from 4 experimental colonies for Monarda, 5 for Lythrum, and 6 for Lobelia; colonies mostly overlapped for the first two species and had approximately 50% overlap for the second and third species. We accounted for colony origin in the analyses (see Statistical analyses)".*

*In the statistical analyses section L322-324, we clarified that the random effect structure corrects for overlap in colonies during trials: "The model included colony and date as random effects, thus accounting for overlap in colonies during trials".*

## Referee: 2

### Comments to the Author(s)

This study presents results from a series of experiments to understand the mechanisms of pathogen transmission between pollinators via flowers. The main goals of the study are to: (1) determine if infected bees tend to defecate more on flowers, (2) frequency of deposition changes with flower shape, and (3) pathogen survival and transmission varies with flower morphology. It was a pleasure to read this manuscript. It is clear and well-written. The experiments were well-done and the statistical analyses are clearly presented and seem appropriate.

*Thank you for these positive comments.*

I only have minor comments on the current version of this manuscript.

\* The title emphasizes that this study reveals new mechanisms of pathogen transmission. However, these mechanisms are not clearly stated or discussed in the abstract and the discussion. Even though the results of this study do not directly allow to test how generalizable these patterns are (meaning do deeper and longer corollas generally facilitate pathogen transmission?), it would benefit the paper to mention hypotheses that emerge from this study about general patterns linking flower morphology and pathogen transmission.

*We have reworded the title to be more representative of the manuscript: “Bee pathogen transmission dynamics: deposition, persistence and acquisition on flowers”. We agree that evaluating floral morphology is an important future direction in the field of bee disease transmission. We now add hypotheses related to morphology in the discussion. Specifically, in L463-467 we state: “We hypothesize that floral morphologies that facilitate overlap in where pollinator feces are deposited and acquired (e.g. flat composites on which bees walk and forage for long periods of time) would result in higher rates of disease transmission compared to morphologies for which deposition and acquisition may be disjointed (e.g., Solanaceous plants that are visited for short periods of time and do not have a landing platform)”.*

\* The results of the pathogen persistence under different environmental conditions are important, clean but are not highlighted in the paper. These results are not mentioned in the abstract and only briefly discussed.

*Thank you for this feedback. We agree and have incorporated the environmental conditions in the abstract and discussion. Specifically, in the abstract on L34-37 we now add “Additionally, we found that *Crithidia* survival across locations was reduced with sun exposure. These results suggest that efficiency of pathogen transmission depends on where deposition occurs and the timing and place of acquisition, which varies among plant species and environmental conditions”. In addition, we dedicate the fifth paragraph of the discussion to the importance of environmental conditions. In L445-448 we now add areas for future research: “Similarly, whether environmental gradients that affect exposure to UV radiation (e.g., along an altitudinal gradient or from the forest canopy to the ground layer) influence bee pathogen transmission dynamics on flowers is entirely unknown and is an important area for future research”.*

\* L74 - This sentence is unclear. The question of whether bee infection increases deposition in flowers is easy to understand after the previous sentence. But why deposition may vary with floral morphology is not discussed until the next paragraph.

*We revised the sentence to conclude the paragraph only discussing the question of whether bee infection increases deposition on flowers, L71-73: “Whether infection affects bee defecation patterns on flowers represents a serious knowledge gap in bee disease transmission dynamics”. The question of floral morphology, as noted, is introduced and discussed in the next paragraph.*

\*L99 - Perhaps the authors could provide more specific predictions about how they expected pathogen survival and infectiousness to vary in flowers with different morphologies and under different environmental conditions. These predictions would help the reader understand earlier on what the different experiments are testing.

*Thank you for this suggestion. We now specify our prediction in L97-100, stating “Therefore, we predicted that pathogen survival and infectiousness would vary across floral parts within the same plant and across species and environmental conditions, and would be lowest for floral parts more exposed to the sun’s UV radiation, such as outside the corolla and on flower bracts”.*

\* L102-109 - This paragraph would be clearer if predictions were followed after the questions outlined here. In addition, it would probably be better to briefly describe the 3 experiments before the methods section. For example, what environmental conditions did you investigate? Also, the phrasing of objective 4 is unclear. I suggest you change it for: “pathogen acquisition and subsequent infection of bees vary among different parts of the flower in different plant species”.

*Thank you for these suggestions. In the third aim, we now specify that the environmental condition evaluated was sun exposure (L105-107: “pathogen survival depends on pathogen deposition and environmental conditions (sun exposure) across flower parts”). We now briefly describe the three experiments and our predictions in the final paragraph of the introduction in L108-121: “We asked these questions by conducting three experiments. In the first experiment (questions 1 and 2), we allowed experimentally infected and uninfected bees fed fluorescent diet to forage on three flower species, and determined how many times and where they defecated on the plants. We predicted that infected bees would defecate more on flowers than uninfected bees, and that defecation patterns would depend on how the bees interact with the morphology of each plant species. In the second experiment (question 3), we placed pathogen inoculum on three flower parts and determined survival for three hours across three plant species, either in sun exposed or shaded conditions. We predicted that the pathogen would survive longer inside the flower corolla and under shaded conditions, due to reduced exposure to UV radiation. In the third experiment (question 4), we allowed uninfected bees to forage on flowers upon which we had placed inoculum on a discrete flower part, and quantified the resulting infection loads one week after exposure. We predicted that resulting infections would be lowest when inoculum was encountered inside the flower corolla, due to increased presence of phytochemicals in pollen and nectar”. Finally, we also made the suggested change in wording for objective four (L107-108).*

\* Will the R scripts be shared as supplementary information? If so, can you indicate that in the text?

*The R scripts will be shared as supplementary information in Dryad alongside the data. We now add that to L482.*

\* L325 - While the authors clarify this later in the text, I think the sentence “bigger bees defecated fewer times inside flowers” is misleading. As mentioned later on, it is likely that the bees were defecating at equal rates but they were doing that outside the flowers because they were larger. Could the authors rephrase? Maybe: “Fewer droplets were detected inside flowers visited by larger bees”.

*That you for this clarifying comment. We now rephrased as “We observed a bee size by flower part interaction for number of fecal droplets observed ( $\chi^2_3 = 9.08, p = 0.028$ ; Figure 3b), whereby fewer droplets were detected inside flowers visited by larger bees (Tukey HSD:  $z = -2.87, p = 0.004$ )” (L341-343).*

\*L385 - The authors mention in L306 that “foraging time” was collected for experiment 3. Could the authors investigate the role of time spent in the flower on how many pathogens were left behind after a visit? Or does foraging time mean something else?

*In experiment 3, uninfected bees foraged on inoculated flowers and we quantified the resulting Crithidia infections. Primarily to ensure foraging behavior was normal, we measured foraging time in trials. Foraging time did not predict either Crithidia incidence or intensity ( $\chi^2_1 = 0.94, p = 0.333$  and  $\chi^2_1 = 2.08, p = 0.150$ , respectively). Nonetheless, time the bee spent foraging and time since the inoculum was made (related to its infectiousness) were both included as covariates in our model to increase accuracy. The question of foraging time and how many pathogens were left after a visit could only be evaluated if we had calculated foraging time for experiment 1, which, for logistical reasons, we did not do. In the discussion, we recommend evaluating foraging time as an important future direction in the field of bee pollinator disease transmission (L463-467).*

\*L411- Add “across floral parts”

*We made this change.*

\* L423 - Sentence is unclear.

*We clarified the sentence as “Otterstatter & Thompson experimentally varied the time and number of Crithidia cells placed on Brassica rapa nectaries encountered by susceptible foraging bumble bees. They found that most foraging bees became infected when exposed to Crithidia that had been placed on the flower for less than 10 minutes; by 85 minutes the probability of infection was under 15%” (L438-442).*

\* Figure 4 - I suggest you add the results for Monarda even if they were not significant. Or at least, mentioned in the legend in what way the data were not significant. Did all the Crithidia die or did they all survive in both treatments?

*Thank you for this comment. We expand the legend and clarified the conditions for Monarda: “Monarda was only evaluated in shade conditions (see methods); we did not find significant differences among flower parts in Monarda, likely due to a high overall Crithidia survival (80%)” (L635-638).*
